# Supplementary material for: Aligning Clinical Practice to PTSD Treatment Guidelines: Medication Prescribing by Provider Type
Source: Atypon-hosted journal article supplement (doi:10.1176/appi.ps.201200217), 2013-02-01
Supplement: 142_ds001.pdf [file 142_ds001.pdf]

Individual medications used in the analyses listed by the VA/DoD PTSD guideline ratings.

| Guideline Rating | Medication name                                                                                                                                                       |
|------------------|-----------------------------------------------------------------------------------------------------------------------------------------------------------------------|
| <b>A</b>         | citalopram, escitalopram, fluoxetine, fluvoxamine, paroxetine, sertraline, duloxetine, venlafaxine, desvenlafaxine                                                    |
| <b>B/I</b>       | clozapine, risperidone, olanzapine, quetiapine, ziprasidone, aripiprazole, and paliperidone                                                                           |
| <b>D</b>         | alprazolam, chlordiazepoxide, clonazepam, clorazepate, diazepam, estazolam, flurazepam, halazepam, lorazepam, oxazepam, prazepam, quazepam, temazepam, and triazolam. |
